# Supplementary material for: Deforestation and stream warming affect body size of Amazonian fishes
Source: PLoS One. 2018 May 2;13(5):e0196560. doi: 10.1371/journal.pone.0196560 (PMC5931656; doi:10.1371/journal.pone.0196560)
Supplement: S4 Data — (XLSX) [file pone.0196560.s011.xlsx]

## Sheet: lab data
Land use	Stream/Origin	Temperature	Initial Mass	Final Mass	Growth (mg)
forest	APP2	24	153	211	58
forest	APP2	24	181	200	19
forest	APP2	24	168	210	42
forest	APP2	24	125	143	18
forest	APP2	24	98	110	12
forest	APP2	24	99
forest	APP2	24	145	183	38
forest	APP2	24	133	190	57
forest	APP2	24	119	173	54
forest	APP2	24	162
forest	APP2	32	197
forest	APP2	32	96	88	-8
forest	APP2	32	94
forest	APP2	32	109	112	3
forest	APP2	32	179	171	-8
forest	APP2	32	128
forest	APP2	32	201	139	-62
forest	APP2	32	193	130	-63
forest	APP2	32	129
forest	APP2	32	120	110	-10
forest	APP2A	24	186	234	48
forest	APP2A	24	167	159	-8
forest	APP2A	24	162	192	30
forest	APP2A	24	131	161	30
forest	APP2A	24	147	141	-6
forest	APP2A	24	120	99	-21
forest	APP2A	24	115	134	19
forest	APP2A	24	111	140	29
forest	APP2A	24	150	161	11
forest	APP2A	24	91	116	25
forest	APP2A	32	162
forest	APP2A	32	123
forest	APP2A	32	111	90	-21
forest	APP2A	32	80	63	-17
forest	APP2A	32	180
forest	APP2A	32	154	114	-40
forest	APP2A	32	142	106	-36
forest	APP2A	32	181	140	-41
forest	APP2A	32	175
forest	APP2A	32	191	114	-77
forest	APPM	24	108
forest	APPM	24	155	201	46
forest	APPM	24	187	209	22
forest	APPM	24	273	309	36
forest	APPM	24	145	150	5
forest	APPM	24	236	248	12
forest	APPM	24	80	122	42
forest	APPM	24	222	266	44
forest	APPM	24	233	250	17
forest	APPM	24	134	176	42
forest	APPM	32	199
forest	APPM	32	232	200	-32
forest	APPM	32	149	133	-16
forest	APPM	32	175	128	-47
forest	APPM	32	178	148	-30
forest	APPM	32	128	97	-31
forest	APPM	32	196	185	-11
forest	APPM	32	117	98	-19
forest	APPM	32	90
forest	APPM	32	137	168	31
deforested	TAN A	24	117	147	30
deforested	TAN A	24	119	162	43
deforested	TAN A	24	164	206	42
deforested	TAN A	24	154	187	33
deforested	TAN A	24	240	244	4
deforested	TAN A	24	94	129	35
deforested	TAN A	24	97	126	29
deforested	TAN A	24	141	147	6
deforested	TAN A	24	152	181	29
deforested	TAN A	24	124	144	20
deforested	TAN A	32	186	168	-18
deforested	TAN A	32	145
deforested	TAN A	32	103	100	-3
deforested	TAN A	32	102	101	-1
deforested	TAN A	32	149	133	-16
deforested	TAN A	32	110	130	20
deforested	TAN A	32	118
deforested	TAN A	32	248	234	-14
deforested	TAN A	32	140	140	0
deforested	TAN A	32	94	102	8
deforested	TAN B	24	89	110	21
deforested	TAN B	24	119	142	23
deforested	TAN B	24	143
deforested	TAN B	24	126	148	22
deforested	TAN B	24	139	161	22
deforested	TAN B	24	104	112	8
deforested	TAN B	24	188	200	12
deforested	TAN B	24	134
deforested	TAN B	24	113	180	67
deforested	TAN B	24	217
deforested	TAN B	32	182	130	-52
deforested	TAN B	32	149	133	-16
deforested	TAN B	32	82	79	-3
deforested	TAN B	32	144	100	-44
deforested	TAN B	32	105	105	0
deforested	TAN B	32	85	104	19
deforested	TAN B	32	164	178	14
deforested	TAN B	32	188	142	-46
deforested	TAN B	32	158	128	-30
deforested	TAN B	32	175
deforested	TAN C	24	100	150	50
deforested	TAN C	24	105	140	35
deforested	TAN C	24	109	128	19
deforested	TAN C	24	113	146	33
deforested	TAN C	24	139	157	18
deforested	TAN C	24	97	117	20
deforested	TAN C	24	217	247	30
deforested	TAN C	24	117	155	38
deforested	TAN C	24	88	107	19
deforested	TAN C	24	106	115	9
deforested	TAN C	32	113	112	-1
deforested	TAN C	32	100	89	-11
deforested	TAN C	32	125	108	-17
deforested	TAN C	32	104	97	-7
deforested	TAN C	32	108	117	9
deforested	TAN C	32	92	104	12
deforested	TAN C	32	191	179	-12
deforested	TAN C	32	115	71	-44
deforested	TAN C	32	107	102	-5
deforested	TAN C	32	119	114	-5
